# Supplementary material for: Evaluation of nanocrystalline Sn3N4derived from ammonolysis of Sn(NEt2)4as a negative electrode material for Li-ion and Na-ion batteries
Source: Royal Society of Chemistry journal article supplement (doi:10.1039/c5ta08287k), 2016-01-01
Supplement: c5ta08287k1.pdf [file c5ta08287k1.pdf]

**Supplementary information: Evaluation of nanocrystalline  $\text{Sn}_3\text{N}_4$  derived from ammonolysis of  $\text{Sn}(\text{NEt}_2)_4$  as a negative electrode material for Li-ion and Na-ion batteries**

Xianji Li, Andrew L. Hector\*, John R. Owen and S. Imran U. Shah

Chemistry, University of Southampton, Southampton SO17 1BJ, UK. [A.L.Hector@soton.ac.uk](mailto:A.L.Hector@soton.ac.uk)

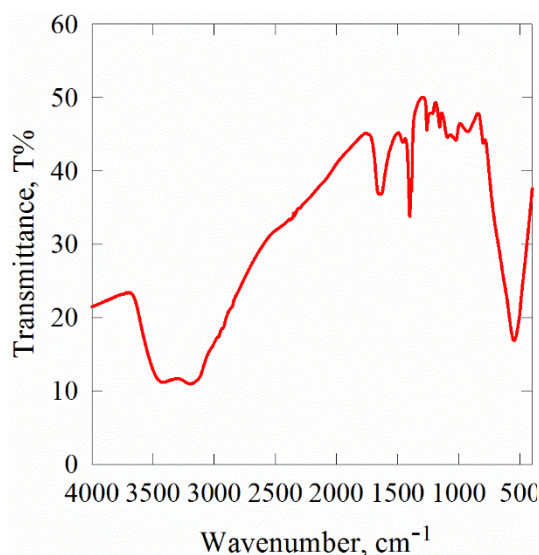

**Fig. S1** IR spectrum of the product of ammonolysis of the tin amide polymer at 300 °C.

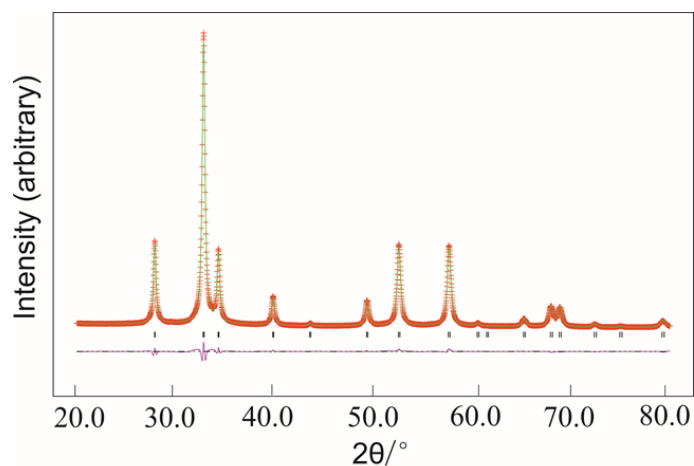

**Fig. S2** Rietveld fit to the powder XRD data for  $\text{Sn}_3\text{N}_4$  produced by ammonolysis of the tin imide polymer at 350 °C followed by washing with dilute HCl. Crosses mark the data points, the upper continuous line the fit and the lower continuous line the difference. Tick marks show the allowed reflection positions for  $\text{Sn}_3\text{N}_4$  with space group  $Fd-3m$ .  $R_{\text{wp}} = 3.6\%$ ,  $R_p = 2.8\%$ .

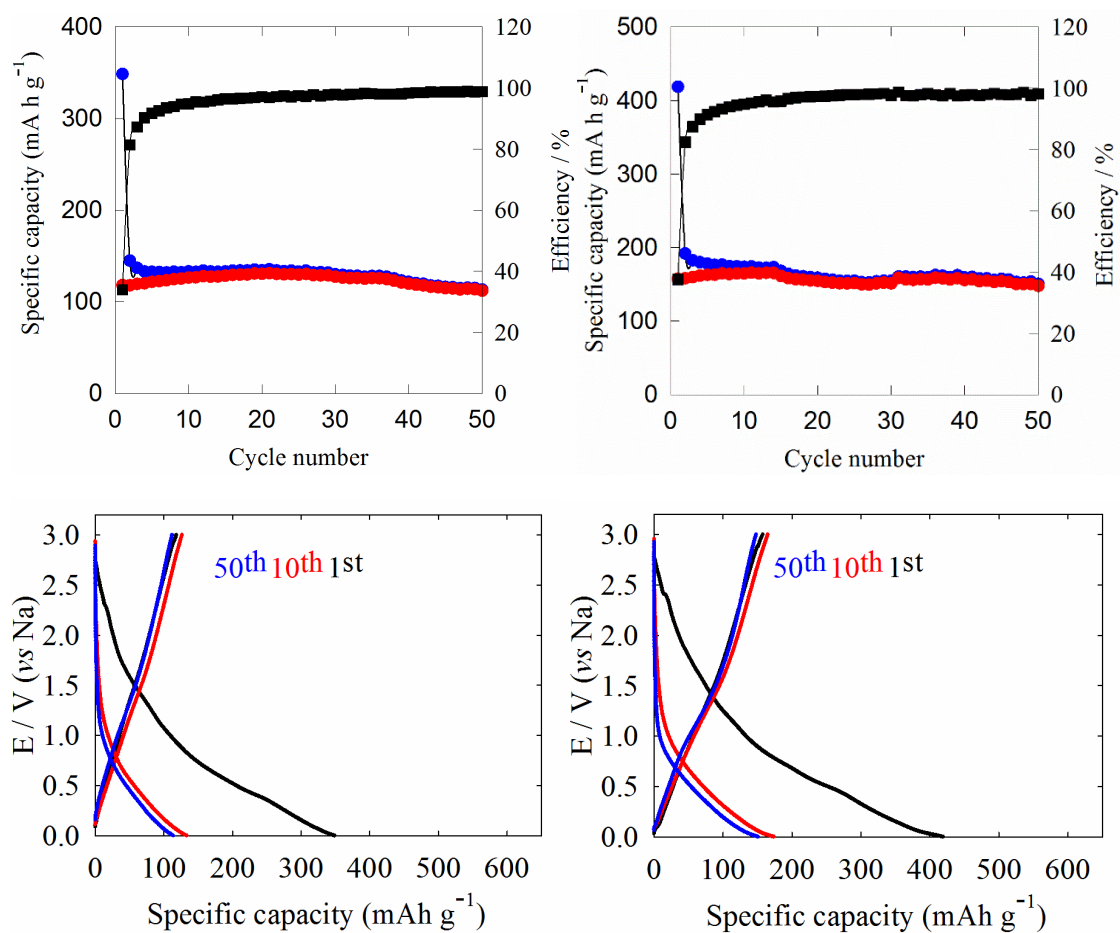

**Fig. S3** Specific capacity versus cycle number (top, reduction blue, oxidation red and Coulombic efficiency black) and voltage profile against specific capacity (bottom), of Sn<sub>3</sub>N<sub>4</sub>/sodium half cells made with CMC binder, cycled between 1 mV and 3 V for 50 cycles at 200 (left) or 100 (right) mA g<sup>-1</sup>.
